# Supplementary material for: Effects of the Abandonment of Traditional Cultural Practices on Epiphytic Bryolichenic Communities in Chestnut Orchards in NW Spain
Source: Preprints.org preprint supplement (doi:10.20944/preprints202311.1094.v1), 2023-11-17
Supplement: Supplementary file 1 [file supplementary]

## Sheet: Hoja1
Table S1.	Aldea do Mazo Managed							Aldea do Mazo Abandoned						Ferramulín Managed						Ferramulín Abandoned					Mercurín Managed						Mercurín Abandoned						Romeor Mostad Managed						Romeor Mostad Abandoned					Santa Eufemia Managed
Lichen taxa collected in sampling squares, orchards and regimen of management. Perimeter of trees in cm in brackets	Trees							Trees						Trees						Trees					Trees						Trees						Trees						Trees					Trees
	T1 (130)	T2 (298)	T3 (200)	T4 (120)	T5 (120)	T6 (152)	T7 (330)	T1 (160)	T2 (195)	T3 (110)	T4 (130)	T5 (120)	T6 (330)	T1 (160)	T2 (150)	T3 (110)	T4 (90)	T5 (260)	T6 (310)	T1 (100)	T2 (165)	T3 (265)	T4 (80)	T5 (270)	T1 (190)	T2 (118)	T3 (150)	T4 (110)	T5 (225)	T6 (290)	T1 (225)	T2 (120)	T3 (300)	T4 (180)	T5 (120)	T6 (150)	T1 (180)	T2 (220)	T3 (125)	T4 (150)	T5 (118)	T6 (270)	T1 (120)	T2 (210)	T3 (150)	T4 (110)	T5 (290)	T1 (150)	T2 (115)
Amandinea punctata (Hoffm.) Coppins & Scheid.																																					9.5			56			1.3	4.7	1.3	4.1	2.5
Arthonia didyma Körb.						0.2
Arthonia radiata (Pers.) Ach.																																												0.3		0.5
Arthonia vinosa Leight.							1
Athallia holocarpa (Hoffm.) Arup, Frödén & Søchting																																						0.2
Bacidia arceutina (Ach.) Th. Fr.																				0.2
Bacidia cf. absistens (Nyl.) Arnold
Bacidia sp.
Biatora vernalis (L.) Fr.																								0.3
Bryobilimbia cf. sanguineoatra (Wulfen) Fryday, Printzen & S. Ekman
Buellia disciformis (Fr.) Mudd
Buellia griseovirens (Turner & Borrer ex Sm.) Almb.
Buellia hyperbolica Bagl.							1											1
Buellia leptoclinoides (Nyl.) J. Steiner
Buellia sp.			0.2
Calicium abietinum Pers.
Calicium parvum Tibell							1									4
Candelariella vitellina (Hoffm.) Müll. Arg.																																					0.1
Candelariella reflexa (Nyl.) Lettau
Catillaria cf. chalybeia (Borrer) A. Massal.																													0.5
Catillaria sp.
Catinaria atropurpurea (Schaer.) Vězda & Poelt																													0.5
Chaenotheca brunneola (Ach.) Müll. Arg.
Chrysothrix candelaris (L.) J.R. Laundon	0.6	0.2	0.4	0.1	0.4	0.5	5.5		1.1		3.2	0.7	0.61	0.3	4.5	5.1		1.2	0.7				1		1.6	0.1	3	0.3	0.1	1.6	0.5		0.2	0.2	0.2	0.3					0.5		1	0.1		0.1	0.7	2.6
Cladonia chlorophaea (Flörke ex Sommerf.) Spreng.																														2.5	4.5		0.2
Cladonia coccifera (L.) Willd.	1.5					3.5	67	1.5	9																			13
Cladonia coniocraea (Flörke) Spreng.		0.5				7.5			7											1.5																													0.7
Cladonia cryptochlorophaea Asahina																																																	0.7
Cladonia digitata (L.) Baumg.
Cladonia dimorpha S. Hammer
Cladonia fimbriata (L.) Fr.																																						1.5						0.5	15		3
Cladonia macilenta Hoffm.																														0.2
Cladonia ochrochlora Flörke																																																49
Cladonia parasitica (Hoffm.) Hoffm.																																	4
Cladonia polydactyla (Flörke) Spreng.														9.5				7							45		1
Cladonia prolifica Ahti & S. Hammer															15
Cladonia pyxidata (L.) Hoffm.		2.5												9											1	4																							2.5
Cladonia squamosa Hoffm.																											53
Cladonia subsquamosa Kremp.
Cladonia sp.																		10					8										4
Cladonia, primary thallus	1	7		0.2	3.2	4	10	0.5	5.5		1.5	0.5		14.2	13.5	5.5	21.5	14	1	1	26	0.5	13.5	2.5	1.1	0.1		0.1	0.6	1			3	0.1	7	2	0.2	0.5	0.4		4.5	46	3	5.3	4.5	6.5	3	0.5	3.5
Coenogonium pineti (Ach.) Lücking & Lumbsch	0.1								0.1		0.5															1					0.1
Collema flaccidum (Ach.) Ach.
Collema furfuraceum (Schaer.) Du Rietz																										5
Collema subflaccidum Degel.			2																																			1
Evernia prunastri (L.) Ach.		0.2			1.5			12			0.5	7.5	7				13					5	41.5		3		2.5					24.5	3	4.3	0.1		1.1			8			1.5					0.2
Flavoparmelia caperata (L.) Hale								4	1		2														9		2
Fuscopannaria ignobilis (Anzi) P.M. Jørg.																										6
Fuscopannaria mediterranea (Tav.) P.M. Jørg.																										0.1												23				1.5			2				0.8
Fuscopannaria nebulosa (Hoffm.) E. Tripp & Lendemer
Graphis elegans (Borrer ex Sm.) Ach.
Gyalecta ophiospora (Lettau) Baloch & Lücking																																																	0.2
Gyalecta sp.
Gyalideopsis muscicola P. James & Vězda	0.5
Hypocenomyce scalaris (Ach.) M. Choisy																																									21.5
Hypogymnia farinacea Zopf						2.5	5
Hypogymnia physodes (L.) Nyl.						1.5	29	1	0.2		3			0.8	2.7	0.1	2.5	1			0.5		1.2		0.2	0.1	4.5					2			0.5
Hypogymnia tubulosa (Schaer.) Hav.							1		0.2									1					1									1	0.5
Hypotrachyna horrescens (Taylor) Krog & Swinscow
Hypotrachyna minarum (Vain.) Krog & Swinscow																															1.5	32.5			1
Hypotrachyna revoluta (Flörke) Hale
Lecanora albella (Pers.) Ach.														0.5
Lecanora argentata (Ach.) Röhl.																															0.5	0.6			0.5		26	1.5	0.3
Lecanora chlarotera Nyl.												0.2
Lecanora cf. farinacea Fée
Lecanora intumescens (Rebent.) Rabenh.			0.5																			4															20			73			1.5	0.5	0.7	6.5	6.5
Lecanora pulicaris (Pers.) Ach.												0.1																				0.5
Lecanora gr. strobilina (Spreng.) Kieff.
Lecanora sp.					1.3												2.5																0.1
Lecidella elaeochroma (Ach.) M. Choisy var. elaeochroma f. elaeochroma																				0.5
Lecidella elaeochroma (Ach.) M. Choisy var. elaeochroma f. soralifera (Erichsen) D. Hawksw.																					0.2
Lecidella euphorea (Flörke) Kremp.																																					2.5			7.5			3			0.8	0.5
Lepra albescens (Huds.) Hafellner	94.5	0.2			41		0.5								0.5		22					2							12	8	6	4.5	27			35					11		3.5		0.6		0.2
Lepra amara (Ach.) Hafellner	1					0.2		0.5	3	6.5	0.5	7	0.3	0.1			41				1.5		27.5		1	11.5	0.1	1.5	8		2	37.5	19	50.5	51.5			7.7			52							17.5	0.5
Lepraria gr. diffusa (J.R. Laundon) Kukwa																									50
Lepraria lobificans Nyl.												1																0.1
Lepraria membranacea (Dicks.) Vain.	0.2	0.5				1	55.5	0.5	13.5		23		5		2.9	16.5	8.7	7	1		1.1		0.3				43.1	2.5		35	1.7	0.5	30		1	0.3					1			1				5	8.2
Lepraria rigidula (B. de Lesd.) Tønsberg																																	5.5
Lepraria sp 1	1.2	4.6	0.3	0.5	0.9	0.2	7.5		6.8		3	0.5	3.2	1.6	12	10.5	50	6	0.1	1	6.2	1	8	1.5		1	1	1.6	0.1	2		0.5		0.1	9.2	0.1			0.2		1.6	32		192.2	13	2.7	2.5
Lepraria sp. 2
Lepraria sp. 3
Lepraria sp. 4
Leptogium gr. microphylloides Nyl.																																																	0.5
Leptogium juressianum Tav.																										3.5
Leucodermia leucomelos (L.) Kalb
Lobaria pulmonaria (L.) Hoffm.																																			1				158								0.2
Lobarina scrobiculata (Scop.) Cromb.		0.5																							15	22		3.5	2.5				7.2	0.1	1.5						6
Lopadium disciforme (Flot.) Kullh.	2				0.2	0.3							0.2				0.5				0.1			0.1							1		0.2
Loxospora elatina (Ach.) A. Massal.						1.5
Maronea constans (Nyl.) Hepp
Melanelixia glabratula (Lamy ex Nyl.) Sandler & Arup	5	8	9.2	10.5	35.5			42.1	19	14.1	0.5	34.1	69	0.6	0.5		2.5			0.7	22.7	5.5	8.5			1	1	1.5	0.1	3.1	19.7	86	19	31.7	11													11
Melanelixia subaurifera (Nyl.) O. Blanco, A. Crespo, Divakar, Essl., D. Hawksw. & Lumbsch																							6
Melanohalea elegantula (Zahlbr.) O. Blanco, A. Crespo, Divakar, Essl., D. Hawksw. & Lumbsch																																						1.5	39.1	50	2		24		10	37	25
Melanohalea exasperatula (Nyl.) O. Blanco, A. Crespo, Divakar, Essl., D. Hawksw. & Lumbsch																																															67
Micarea adnata Coppins											0.2					1					0.1
Micarea elachista (Körb.) Coppins & R. Sant.																		0.5
Micarea globulosella (Nyl.) Coppins
Micarea melaena (Nyl.) Hedl.																2.1		0.1									1
Micarea cf. peliocarpa (Anzi) Coppins & R. Sant.
Micarea prasina Fr.												1
Micarea synotheoides (Nyl.) Coppins														0.5
Micarea viridileprosa Coppins & van den Boom
Micarea sp.																																																	0.1
Nephroma laevigatum Ach.																								83.5		9.5		6	22.5									58				55	1	3.8	31.5		6.4	1.5	30.5
Nephroma parile (Ach.) Ach.																				9.5								7.5											20.5			0.5			1	1	0.5		1
Nephroma tangeriense (Maheu & A. Gillet) Gattefossé & Werner
Nephroma sp.
Nephromopsis chlorophylla (Willd.) Divakar, A. Crespo & Lumbsch					0.5	1.7	9.5				0.1				0.2										0.1
Normandina pulchella (Borrer) Nyl.					0.5					0.1																3															0.1								3
Ochrolechia androgyna (Hoffm.) Arnold																																									9.3
Ochrolechia parella (L.) A. Massal.																																	0.1
Ochrolechia subviridis (Høeg) Erichsen
Ochrolechia cf. xanthostoma (Sommerf.) K. Schmitz & Lumbsch															0.2
Pannaria conoplea (Ach.) Bory																										0.6		0.5
Parmelia saxatilis (L.) Ach.		100.5				5.5		12.5	13.5	53.5	99.2	1	3				1.5				16.5						1.1				51.6		0.5		22	0.2
Parmelia sulcata Taylor	3	18.5	0.7	70.5	71.5		5	115.5	3.5	48	3.5	7.5	104.5	3			71		3	23	36	112.5	32		0.1	1	0.6		0.1		1	35	0.5	2.1	6.5		1.3	4		39.5			5
Parmelia sp.																																												1.7
Parmeliella parvula P.M. Jørg.						0.3								0.2			0.1		0.1				0.3						0.1		0.2																		1
Parmeliella testacea P.M. Jørg.
Parmeliella triptophylla (Ach.) Müll. Arg.																															0.1		0.1
Parmeliella sp.
Parmelina carporrhizans (Taylor) Hale
Parmelina pastillifera (Harm.) Hale					16					4		5
Parmelina tiliacea (Hoffm.) Hale		5											2.5																												1
Parmeliopsis ambigua (Hoffm.) Nyl.														3					2
Parmeliopsis hyperopta (Ach.) Vain.														2.3				0.1
Parmotrema perlatum (Huds.) M. Choisy
Pectenia plumbea (Lightf.) P.M. Jørg., L. Lindblom, Wedin & S. Ekman																								1.2
Peltigera collina (Ach.) Schrad.			3																									2		0.5
Peltigera praetextata (Flörke ex Sommerf.) Zopf
Pertusaria coccodes (Ach.) Nyl.								3	5	3									2			6					1								6.5	2					18							2
Pertusaria coronata (Ach.) Th. Fr.																																			2
Pertusaria flavida (DC.) J.R. Laundon	5.5	3.5				1.2	0.5	6.6	1.5	3.5	0.2	8	3.5	1.5					2.5		2			1									11.5	6	1.1	10		32	2	1	4	1	2		0.1			6
Pertusaria hymenea (Ach.) Schaer.																														5
Pertusaria leioplaca (Ach.) DC.			1														1			0.8			2								0.1
Pertusaria pertusa (L.) Tuck.						0.5				12	1.5																				1	6.5		55	8.5			0.4					2				11.5	4	0.2
Pertusaria pustulata (Ach.) Duby
Pertusaria gr. pustulata (Ach.) Duby																					0.5
Pertusaria sp.																			1																											0.5
Phlyctis agelaea (Ach.) Flot.															3.5
Phlyctis argena (Ach.) Flot.						1	2			1		6	10.2						2	21.5		5	12.5	19.5				15	2						19.5	5					9.3		26					2.5
Physcia adscendens H. Olivier																																					0.2
Physcia leptalea (Ach.) DC.
Physconia distorta (With.) J.R. Laundon			1
Placynthiella icmalea (Ach.) Coppins & P. James																									1
Placynthiella uliginosa (Schrad.) Coppins & P. James							3
Platismatia glauca (L.) W.L. Culb. & C.F. Culb.						11																	8.5
Polyozosia gr. dispersa (Pers.) S.Y. Kondr., Lőkös & Farkas																							1.5
Ramalina calicaris (L.) Röhl.			1														2
Ramalina farinacea (L.) Ach.	2.5		8.9	5.7	5							1					0.5				9.5	6.5	0.5	0.1	15.6	1	0.5			0.7	0.1	9.1	0.5				0.2			6							3
Ramalina fraxinea (L.) Ach.
Ramalina sp.
Ricasolia amplissima - cyanomorph (Scop.) De Not.			0.8		0.5					0.5														0.3		1.5			0.1			0.2						0.2											1.5
Rinodina efflorescens Malme					11			0.5														0.5
Rinodina isidioides (Borrer ex Hook. & Sowerby) H. Olivier																										0.1	0.1	0.1								0.2												12
Rinodina cf. pyrina (Ach.) Arnold																				0.2
Scoliciosporum umbrinum (Ach.) Lojka
Scytinium lichenoides (L.) Otálora, P.M. Jørg. & Wedin			0.8																							0.5
Sphinctrina sp.
Sticta fuliginosa (With.) Ach.																										0.8			0.6	0.5
Sticta limbata (Sm.) Ach.																										1.1
Sticta sp.																																	1
Trapelia corticola Coppins & P. James
Trapeliopsis cf. granulosa (Hoffm.) Lumbsch															0.2	0.2
Usnea glabrescens (Nyl. ex Vain.) Vain.
Usnea sp.						0.1																	0.5		0.1												0.5
Varicellaria hemisphaerica (Flörke) I. Schmitt & Lumbsch		3.5		0.5								2.5	1	1.2	1.5						1	2											1.5	0.1		5					1							0.2
[truncated: 46 more columns]
