# Supplementary material for: Effects of the Abandonment of Traditional Cultural Practices on Epiphytic Bryolichenic Communities in Chestnut Orchards in NW Spain
Source: Preprints.org preprint supplement (doi:10.20944/preprints202311.1094.v1), 2023-11-17
Supplement: Supplementary file 3 [file Tabla S2 Bryophyte Taxa Collected.xlsx]

## Sheet: Hoja1
Table S2.	Aldea do Mazo Managed							Aldea do Mazo Abandoned						Ferramulín Managed						Ferramulín Abandoned					Mercurín Managed						Mercurín Abandoned						Romeor Mostad Managed						Romeor Mostad Abandoned					Santa Eufemia Managed
Bryophyte taxa collected in sampling squares, orchards and regimen of management. Perimeter of trees in cm in brackets	Trees							Trees						Trees						Trees					Trees						Trees						Trees						Trees					Trees
	T1 (130)	T2 (298)	T3 (200)	T4 (120)	T5 (120)	T6 (152)	T7 (330)	T1 (160)	T2 (195)	T3 (110)	T4 (130)	T5 (120)	T6 (330)	T1 (160)	T2 (150)	T3 (110)	T4 (90)	T5 (260)	T6 (310)	T1 (100)	T2 (165)	T3 (265)	T4 (80)	T5 (270)	T1 (190)	T2 (118)	T3 (150)	T4 (110)	T5 (225)	T6 (290)	T1 (225)	T2 (120)	T3 (300)	T4 (180)	T5 (120)	T6 (150)	T1 (180)	T2 (220)	T3 (125)	T4 (150)	T5 (118)	T6 (270)	T1 (120)	T2 (210)	T3 (150)	T4 (110)	T5 (290)	T1 (150)	T2 (115)
Antitrichia curtipendula (Hedw.) Brid.																																													37
Cephaloziella stellulifera (Taylor ex Carrington & Pearson) Croz.		0.3		0.2			0.4						0.2						0.2	0.2	1.5	0.3		0.4									0.1
Cynodontium polycarpon (Hedw.) Schimp.
Dicranoweisia cirrata (Hedw.) Lindb.		0.5					12																																								0.2
Dicranum scoparium Hedw.		21		2			0.5						31								2			42.5	0.1	1.1	2.1			0.5					1	1
Dicranum tauricum Sapjegin		3					7.5								1.5				3.5	2	5	46.1	0.3	7.5									5
Frullania dilatata (L.) Dumort.			1		3.1			0.2	0.2	133.5	77.5	27.5	0.2		0.1	0.5	5.5															34.2		0.7			5.5	35.1	34	29	33	54	32.2	4.2		3.5
Frullania fragilifolia (Taylor) Gottsche, Lindenb. & Nees		2		1		1		1																	1		2					0.5																3
Frullania tamarisci (L.) Dumort.		13.5				2.5																			12	8	21	26.5	18	22	3.2	0.5	4	59.5	51	72
Frullania sp.
Grimmia trichophylla Grev.										0.1
Habrodon perpusillus (De Not.) Lindb.										0.3
Homalothecium sericeum (Hedw.) Schimp.																																22										1		2.5
Hypnum andoi A.J.E.Sm.																	22
Hypnum cupressiforme Hedw.	125	154.5	86	134.5	40.3	50.3	74.5	153.5	153.5	35.5	41	45.5	75	44.2	109	24.2	83	142	107.5	188.5	138	21	119.2	45	159	13.5	60	30.5	58	1	5	21	77	1	172.5	167	26	27	20	2	24	75	26		17	0.5	138	106	103
Isothecium myosuroides Brid.										0.2																				200	78				16	0.5
Leucobryum juniperoideum (Brid.) Müll.Hal.
Lewinskya rupestris (Schleich. ex Schwägr.) F.Lara, Garilleti & Goffinet												1																						6			0.5				75.3	21		0.3	97	8	3.2		0.5
Lewinskya speciosa (Nees) F.Lara, Garilleti & Goffinet																																												1
Lewinskya striata (Hedw.) F.Lara, Garilleti & Goffinet										40	5.1																																9.5						0.5
Metzgeria furcata (L.) Corda										8				0.5	0.1			0.5								0.1		1	0.5									0.1			3						0.2
Microlejeunea ulicina (Taylor) Steph.													0.2												0.1		0.5
Neckera pumila Hedw.																																2				10
Nogopterium gracile (Hedw.) Crosby & W.R.Buck			0.1																												31	1		13	0.5
Orthotrichum sp.										2.5
Plagiochila asplenioides (L.) Dumort.
Plagiochila porelloides (Torr. ex Nees) Lindenb.																																				0.5
Porella platyphylla (L.) Pfeiff.																																						0.3
Pulvigera lyellii (Hook. & Taylor) Plášek, Sawicki & Ochyra			10.7		4.5	2.1		3	12.2	39	8.5	42		5.5	1		0.2	10.8					3.8	18		0.5			2.5			5		7.5	0.5		21.5	88.1	123	91.5		5.5		166.5				30.5	12.5
Radula complanata (L.) Dumort.								0.2		1.5																									0.5		4	0.2			19				0.2
Ulota crispa (Hedw.) Brid.																							1.1																									0.5
Ulota crispula Bruch																																					1.7
[truncated: 46 more columns]
