# Supplementary material for: Effects of the Abandonment of Traditional Cultural Practices on Epiphytic Bryolichenic Communities in Chestnut Orchards in NW Spain
Source: Preprints.org preprint supplement (doi:10.20944/preprints202311.1094.v1), 2023-11-17
Supplement: Supplementary file 4 [file Table S3 Lichen Traits and Ecological Requirements.xlsx]

## Sheet: Hoja1
Lichen Taxa	TRAITS																										ECOLOGICAL REQUIREMENTS
	Growth Form										Size		Photobiont			Reproductive strategy			Type of ascoma			Ascospores septation			Chemistry		pH					Solar irradiation					Aridity					Eutrophication					Poleotolerance
	Cr.lepr.	Cr.endo	Cr.epi	Squa.	Fol.b	Fol.n	Frut.f	Frut.r	Compound	G	Mac	Mic	Ch	Tr	Cy	S	A.i	A.s	Apothecia	Lirellae	Perithecia	Simple	Septate	Muriform	No substances	Substances	1	2	3	4	5	1	2	3	4	5	1	2	3	4	5	1	2	3	4	5	0	1	2
Amandinea punctata			1									1	1			1			1				1		1		1	1	1						1	1			1	1			1	1	1			1	1
Arthonia didyma		1										1		1		1				1			1		1		1	1					1	1	1			1				1	1	1				1
Arthonia radiata			1									1		1		1				1			1		1			1	1					1	1			1	1			1	1	1				1	1
Arthonia vinosa		1										1		1		1				1			1		1		1	1				1	1				1	1				1					1
Athallia holocarpa		1										1	1			1			1				1			1		1	1						1	1			1	1	1		1	1	1	1		1	1
Bacidia cf. absistens			1									1	1			1			1				1		1			1	1				1	1			1	1				1						1
Bacidia arceutina			1									1	1			1			1				1		1			1	1					1	1			1	1			1	1					1
Biatora vernalis			1									1	1			1			1				1		1		1	1						1	1			1	1			1						1
Bryobilimbia cf. sanguineoatra			1									1	1			1			1			1			1			1	1				1	1				1	1			1						1
Buellia disciformis			1									1	1			1			1				1			1	1	1						1	1			1				1	1					1
Buellia griseovirens			1									1	1			1		1	1					1		1	1	1					1	1	1			1	1			1						1	1
Buellia hyperbolica			1									1	1			1			1				1			1	1	1						1	1				1			1	1					1
Buellia leptoclinoides			1									1	1			1			1				1			1		1	1					1	1		1	1				1						1
Calicium abietinum		1										1	1			1			1				1		1		1	1					1	1				1				1						1
Calicium parvum		1										1	1			1			1				1			1
Candelariella reflexa			1									1	1			1		1	1			1				1			1	1					1	1			1						1	1		1	1
Candelariella vitellina			1									1	1			1			1			1				1	1	1	1					1	1	1			1	1			1	1	1	1		1	1
Catillaria cf. chalybeia			1									1	1			1			1				1		1			1	1				1	1	1			1	1			1	1	1				1	1
Catinaria atropurpurea			1									1	1			1			1				1		1			1	1					1	1			1				1	1				1
Chaenotheca brunneola		1										1	1			1			1				1			1	1	1					1	1			1	1				1						1
Chrysothrix candelaris	1											1	1					1	1				1			1	1	1						1			1	1	1			1						1	1
Cladonia chlorophaea									1		1		1					1	1			1				1	1	1	1					1	1	1		1	1			1	1					1	1
Cladonia coccifera									1		1		1					1	1			1				1	1	1							1	1			1	1		1	1	1				1
Cladonia coniocraea									1		1		1					1	1			1				1		1	1					1	1			1	1			1	1	1				1	1
Cladonia cryptochlorophaea									1		1		1					1	1			1				1	1	1						1	1				1			1						1
Cladonia digitata									1		1		1					1	1			1				1	1	1						1	1			1	1			1						1
Cladonia dimorpha									1		1		1					1	1			1				1			1	1					1				1			1						1
Cladonia fimbriata									1		1		1					1	1			1				1	1	1	1					1	1			1	1			1	1	1				1	1
Cladonia macilenta									1		1		1			1			1			1				1	1	1						1	1			1	1			1	1					1	1
Cladonia ochrochlora									1		1		1					1	1			1				1		1	1					1	1			1	1			1	1	1				1	1
Cladonia parasitica									1		1		1			1			1			1				1	1	1						1				1	1			1						1
Cladonia polydactyla									1		1		1					1	1			1				1	1							1				1	1			1						1
Cladonia prolifica									1		1		1			1			1			1				1	1	1						1				1				1						1
Cladonia pyxidata									1		1		1			1			1			1				1		1	1					1	1	1		1	1			1	1	1				1	1
Cladonia squamosa									1		1		1				1		1			1				1	1	1						1				1	1			1	1					1
Cladonia subsquamosa									1		1		1				1		1			1				1	1	1						1				1				1						1
Coenogonium pineti			1									1		1		1			1				1		1		1	1	1				1	1			1	1	1			1	1					1	1
Collema flaccidum					1					1	1				1		1		1				1		1				1	1				1	1			1				1	1					1	1
Collema furfuraceum					1					1	1				1		1		1				1		1			1	1					1	1			1				1	1	1				1
Collema subflaccidum					1					1	1				1		1		1				1		1			1	1					1	1			1					1	1				1	1
Evernia prunastri							1				1		1					1	1			1				1	1	1	1					1	1	1		1	1			1	1	1				1	1
Flavoparmelia caperata					1						1		1					1	1			1				1		1	1					1	1				1			1	1	1				1	1
Fuscopannaria ignobilis				1							1				1	1			1			1			1			1	1					1	1		1	1				1	1					1
Fuscopannaria mediterranea				1							1				1			1	1			1			1				1					1	1			1				1	1					1
Fuscopannaria nebulosa			1									1			1			1	1			1			1			1	1					1	1			1				1	1					1	1
Graphis elegans			1									1		1		1				1			1			1		1	1				1	1				1				1					1
Gyalecta ophiospora		1										1		1		1			1				1		1
Gyalideopsis muscicola			1									1	1				1		1				1		1
Hypocenomyce scalaris				1							1		1					1	1			1				1	1	1						1	1	1			1	1		1						1	1
Hypogymnia farinacea						1					1		1					1	1			1				1	1	1						1	1				1	1		1						1	1
Hypogymnia physodes						1					1		1					1	1			1				1	1	1	1					1	1			1	1			1	1					1	1
Hypogymnia tubulosa						1					1		1					1	1			1				1	1	1						1				1	1			1	1					1	1
Hypotrachyna horrescens					1						1		1				1		1			1				1		1	1					1			1	1				1	1				1
Hypotrachyna minarum					1						1		1					1	1			1				1	1	1						1			1	1				1					1
Hypotrachyna revoluta					1						1		1					1	1			1				1	1	1						1				1	1			1	1	1				1	1
Lecanora albella			1									1	1			1			1			1				1	1	1						1				1				1						1
Lecanora argentata			1									1	1			1			1			1						1	1					1	1				1			1	1					1	1
Lecanora chlarotera			1									1	1			1			1			1				1		1	1					1	1	1			1	1			1	1	1	1		1	1
Lecanora cf. farinaria			1									1	1			1			1			1				1
Lecanora intumescens			1									1	1			1			1			1				1		1						1	1			1				1						1
Lecanora pulicaris			1									1	1			1			1			1				1	1	1						1	1	1		1	1	1		1	1					1	1
Lecanora gr. strobilina			1									1	1			1			1			1				1	1	1						1				1	1			1						1
Lecidella elaeochroma var. elaeochroma f. elaeochroma			1									1	1			1			1			1				1		1	1	1				1	1	1		1	1	1	1		1	1	1			1	1
Lecidella elaeochroma var. elaeochroma f. soralifera			1									1	1					1	1			1				1		1	1	1				1				1	1				1	1				1	1
Lecidella euphorea			1									1	1			1			1			1				1		1	1					1	1			1	1	1			1	1				1	1
Lepra albescens			1								1		1					1	1			1				1		1	1					1	1			1	1			1	1	1				1	1
Lepra amara			1								1		1					1	1			1				1	1	1	1				1	1	1			1	1			1	1	1				1	1
Lepraria gr. diffusa	1											1	1					1								1			1	1	1			1	1				1			1	1					1
Lepraria lobificans	1											1	1					1								1		1	1				1	1	1			1	1	1		1						1
Lepraria membranacea	1											1	1					1								1	1	1					1	1					1			1	1					1
Lepraria rigidula	1											1	1					1								1		1	1				1	1	1			1	1			1	1	1				1
Leptogium gr. microphylloides						1				1		1			1		1		1					1	1
Leptogium juressianum						1				1	1				1		1								1
Leucodermia leucomelos						1					1		1					1	1				1			1		1	1						1		1					1	1				1
Lobaria pulmonaria					1						1		1				1	1	1				1			1		1	1					1			1	1				1	1					1
Lobarina scrobiculata					1						1				1			1	1				1			1	1	1						1			1	1				1					1
Lopadium disciforme			1									1	1			1			1					1	1		1	1						1				1	1			1						1
Loxospora elatina			1									1	1					1	1				1			1	1	1					1	1				1	1			1					1
Maronea constans			1									1	1			1			1				1			1		1	1						1	1			1				1	1				1
Melanelixia glabratula					1						1		1			1	1		1			1				1		1	1					1	1			1	1				1	1				1	1
Melanelixia subaurifera					1						1		1			1		1	1			1				1		1	1					1	1			1	1			1	1	1				1	1
Melanohalea elegantula					1						1		1			1	1		1			1			1			1	1					1	1				1				1	1				1
Melanohalea exasperatula					1						1		1			1	1		1			1			1			1	1					1	1	1			1					1				1	1
Micarea adnata			1									1	1			1			1				1		1		1	1					1	1			1	1				1	1					1
Micarea elachista			1									1	1			1			1				1		1		1	1						1				1	1			1						1
Micarea globulosella			1									1	1			1			1				1			1	1	1				1	1	1			1	1				1						1
Micarea melaena			1									1	1			1			1				1			1	1	1					1	1	1			1				1						1
Micarea cf. peliocarpa			1									1	1			1			1				1			1	1	1						1				1	1			1						1
Micarea prasina			1									1	1			1			1				1			1	1	1					1	1				1				1						1
Micarea synotheoides			1									1	1						1				1		1
Micarea viridileprosa			1									1	1					1	1				1			1	1	1						1			1	1				1					1
Nephroma laevigatum					1						1				1	1			1				1			1		1	1					1			1	1				1						1
Nephroma parile					1						1				1			1								1		1	1					1			1					1	1				1
Nephroma tangeriense					1						1				1		1		1				1			1		1	1						1			1	1			1						1
Nephromopsis chlorophylla					1						1		1					1								1	1	1						1	1				1			1	1					1
Normandina pulchella				1								1	1					1								1		1	1					1	1			1	1			1	1	1				1	1
Ochrolechia androgyna			1								1		1			1		1	1			1				1	1	1						1				1				1						1
Ochrolechia parella			1								1		1			1			1			1				1		1	1					1	1			1	1			1	1	1				1	1
Ochrolechia subviridis			1								1		1					1	1			1				1	1	1						1	1			1				1						1
Ochrolechia cf. xanthostoma			1								1		1			1			1			1				1	1	1						1	1			1				1						1
Pannaria conoplea						1						1			1	1			1			1				1		1	1					1			1					1					1
Parmelia saxatilis					1						1		1			1	1		1			1				1	1	1						1	1			1	1			1	1	1				1	1
Parmelia sulcata					1						1		1			1		1	1			1				1	1	1	1					1	1	1		1	1			1	1	1				1	1
Parmeliella parvula				1								1			1			1	1			1			1			1	1					1			1	1				1					1
Parmeliella testacea				1								1			1			1	1			1			1		1	1						1			1	1				1						1
Parmeliella triptophylla				1								1			1		1		1			1			1			1	1					1			1	1				1						1
Parmelina carporrhizans					1						1		1			1			1			1				1		1	1						1	1			1	1			1	1				1	1
Parmelina pastillifera					1						1		1				1									1		1	1						1			1					1	1				1	1
Parmelina tiliacea					1						1		1				1									1		1						1	1				1				1	1				1	1
Parmeliopsis ambigua						1					1		1					1	1			1				1	1	1						1	1	1			1	1		1						1	1
Parmeliopsis hyperopta						1					1		1					1	1			1				1	1	1						1					1			1						1	1
Parmotrema perlatum					1						1		1					1	1			1				1	1	1						1	1			1	1			1	1					1	1
Pectenia plumbea						1					1				1	1			1			1			1			1	1				1	1			1	1				1	1				1
Peltigera collina					1						1				1			1	1				1			1		1	1					1			1	1				1	1					1
Peltigera praetextata					1						1				1		1		1				1		1			1	1	1				1	1				1			1	1					1	1
Pertusaria coccodes			1								1		1				1		1			1				1		1	1					1	1			1				1	1	1				1
Pertusaria coronata			1								1		1				1		1			1				1		1	1					1	1			1				1	1					1
Pertusaria flavida			1								1		1					1	1			1				1		1	1					1	1			1				1	1					1
Pertusaria hymenea			1								1		1			1			1			1				1		1	1						1	1		1	1			1	1					1	1
Pertusaria leioplaca			1								1		1			1			1			1				1	1	1						1	1			1	1			1	1					1
Pertusaria pertusa			1								1		1			1			1			1				1		1						1				1	1			1	1					1	1
Pertusaria pustulata			1								1		1			1			1			1				1	1	1						1				1	1			1						1
Phlyctis agelaea			1								1		1			1			1					1		1		1	1					1				1	1			1	1					1	1
Phlyctis argena			1								1		1					1	1					1		1	1	1					1	1				1	1			1	1					1	1
Physcia adscendens						1					1		1					1	1				1			1		1	1	1	1				1	1			1	1				1	1	1		1	1
Physcia leptalea						1					1		1			1			1				1			1		1	1	1					1	1			1	1			1	1				1	1
Physconia distorta						1					1		1			1			1				1		1				1	1					1	1			1	1				1	1			1	1
Placynthiella icmalea			1									1	1			1	1		1			1				1	1	1						1	1			1	1			1	1					1	1
Placynthiella uliginosa			1									1	1			1			1			1			1		1	1						1	1				1			1						1	1
Platismatia glauca					1						1		1				1		1			1				1	1	1						1	1	1			1			1	1					1	1
Polyozosia gr. dispersa		1										1	1			1			1			1			1					1	1			1	1	1				1	1		1	1	1				1
Ramalina calicaris							1				1		1			1			1				1			1	1	1							1			1				1	1					1
Ramalina farinacea							1				1		1					1	1				1			1		1	1					1	1	1	1	1				1	1					1	1
Ramalina fraxinea							1				1		1			1			1				1			1		1	1						1	1		1	1				1	1				1
Ricasolia amplissima - cyanomorph								1				1			1			1							1			1	1				1	1			1	1				1					1
Rinodina efflorescens			1									1	1					1								1	1	1						1					1			1						1
Rinodina isidioides			1									1	1			1	1		1				1			1	1	1						1				1				1	1				1
Rinodina cf. pyrina			1									1	1			1			1				1		1			1	1						1	1			1				1	1				1	1
Scoliciosporum umbrinum			1									1	1			1			1				1		1		1	1	1					1	1			1	1	1		1	1	1				1	1
Scytinium lichenoides						1				1	1				1		1		1					1	1				1	1	1			1	1	1		1	1	1		1	1	1				1	1
Sticta fuliginosa					1						1				1		1								1		1	1						1			1					1					1
Sticta limbata					1						1				1			1							1		1	1						1			1					1					1
Trapelia corticola			1									1	1					1								1		1	1					1				1				1	1					1
Trapeliopsis cf. granulosa			1									1	1					1	1			1				1	1	1						1	1			1	1			1						1
Usnea glabrescens								1			1		1					1								1	1	1							1	1		1				1						1
Varicellaria hemisphaerica			1								1		1					1								1	1	1						1	1			1	1			1	1					1
[truncated: 2 more columns]
