# Supplementary material for: Effects of the Abandonment of Traditional Cultural Practices on Epiphytic Bryolichenic Communities in Chestnut Orchards in NW Spain
Source: Preprints.org preprint supplement (doi:10.20944/preprints202311.1094.v1), 2023-11-17
Supplement: Supplementary file 5 [file Table S4 Bryophyte Traits and Ecological Requirements.xlsx]

## Sheet: jvs12646-sup-0004-appendix_espe
Species	forest	ind_L	ind_T	ind_F	ind_R	ind_N	hemeroby	life_form	life_strat	veg_gem	veg_bran	veg_leav	Observations
Antitrichia curtipendula	M2.1	6	3	4	6	2	3	weft	l	0	0	0
Cephaloziella stellulifera	NA	NA	NA	NA	NA	NA	NA	NA	NA	NA	NA	NA	not available (NA)
Cynodontium polycarpon	M2.1	Ind	Ind	Ind	Ind	NA	2	turf	c	0	0	0
Dicranoweisia cirrata	M2.1	7	6	5	5	4	6	cushion	c	0	0	0
Dicranum scoparium	M2.1	5	Ind	4	4	2	3	turf	p	0	0	0
Dicranum tauricum	M1.1	4	3	4	3	3	5	turf	p	0	0	1
Frullania dilatata	M2.1	8	3	4	5	4	3	turf	l	1	0	0
Frullania fragilifolia	M2.1	7	4	5	4	2	2	turf	l	0	0	1
Frullania tamarisci	M2.1	7	3	4	5	2	4	weft	l	0	0	0
Grimmia trichophylla	M2.2	7	5	3	5	2	2	turf	p	1	0	0
Habrodon perpusillus	M1.1	6	8	5	5	4	6	mat	p	1	0	0
Homalothecium sericeum	M2.1	8	3	2	7	4	3	mat	p	0	0	0
Hypnum andoi	M1.1	3	4	6	3	3	5	turf	p	0	0	0
Hypnum cupressiforme	M2.1	Ind	Ind	Ind	Ind	4	5	turf	p	0	0	0
Isothecium myosuroides	M1.1	4	4	6	4	3	3	dendroid	p	0	0	0
Leucobryum juniperoideum	M1.1	7	4	6	2	2	4	cushion	p	0	1	1
Lewinskya speciosa	M2.1	7	2	5	5	4	NA	turf	s	0	0	0
Lewinskya rupestris	M1.2	8	2	3	6	3	4	cushion	c	0	0	0
Lewinskya striata	M2.1	8	3	5	6	4	4	turf	s	0	0	0
Metzgeria furcata	M2.1	5	3	4	6	3	3	mat	p	1	0	0
Microlejeunea ulicina	M1.1	5	5	5	3	3	2	annual	l	0	1	0
Neckera pumila	M1.1	5	3	5	5	4	4	turf	l	0	1	0
Nogopterium gracile	M2.1	5	5	4	5	2	3	mat	l	0	0	0
Plagiochila asplenioides	M1.1	4	4	6	6	4	3	turf	p	0	0	0
Plagiochila porelloides	M1.1	6	3	4	7	4	3	turf	p	0	0	0
Porella platyphylla	M1.1	5	3	4	6	3	3	turf	p	0	0	0
Pulvigera lyellii	M2.1	7	4	4	5	4	6	turf	s	1	0	0
Radula complanata	M2.1	7	3	5	7	3	2	turf	l	1	0	0
Ulota crispa	M2.1	4	3	6	3	3	3	turf	s	0	0	0
Ulota crispula	NA	NA	NA	NA	NA	NA	NA	NA	NA	NA	NA	NA	not available (NA)

## Sheet: Traits
TRAITS	ABB.	DESCRIPTION	UNIT	ATTRIBUTES
Autecological traits
Forest species	forest	Information how strong species are bound to forest habitats (Schmidt, Kriebitzsch, & Ewald, 2011)	M1.1	Largely restricted to closed forest
			M1.2	Prefers forest edges and in clearings
			M2.1	Occurs in forests as well as in open land
			M2.2	May occur in forests, but prefers open land
Indicator value: light	ind_L	Occurrence in relation to the relative irradiance intensity at the time when the deciduous plants are full in leaf	1	Plant in deep shade
			3	Shade plant
			5	Semi-shade plant, rarely in full light
			7	Plant generally in well-lit places, but also occurring in partial shade
			9	Plant in full light, found mostly in full sun
			Ind	Indifferent
Indicator value: temperature	ind_T	Occurrence in the temperature gradients from the Artic and the Mediterranean and from the alpine levels to lowlands	1	Cold-indicator plant, found only in high mountains, mostly in alpine and nival levels
			3	Indicator of cool conditions, mainly subalpine
			5	Indicator of fairly warm conditions, from lowland to montane, but especially in the submontane-temperate sites
			7	Warmth indicator, in warm lowland sites and colline levels
			9	Indicator of extremely warm conditions
			Ind	Indifferent
Indicator value: moisture	ind_F	Occurrence in the gradient from dry, shallow-soil rocky slopes to swampy ground	1	Indicator of extreme dryness, restricted to soils that often dry out for some time
			3	Dry-site indicator, more often found on dry ground than in moist places
			5	Moist-site indicator, mainly on fresh soils of average dampness
			7	Dampness indicator, mainly on constantly moist or damp, but not on wet
			9	Wet-site indicator, often on water-saturated, badly aerated soils
			Ind	Indifferent
Indicator value: reaction	ind_R	Occurrence in the gradient of soil acidity and lime content	1	Indicator of extreme acidity, never found on weakly acid or basic soils
			3	Acidity indicator, mainly on acid soils, but exceptionally also on nearly neutral ones
			5	Indicator of moderately acid soils, only occasionally found on very acid or on neutral to basic soils
			7	Indicator of weakly acid to weakly basic conditions; never found on very acid soils
			9	Indicator of basic reaction, always found on calcareous or other high-pH soils
			Ind	Indifferent
Indicator value: nutrient	ind_N	Occurrence in the gradient of nutrient availability, eutrophication	1	Plants on sites with very low nutrient content
			3	Plants on sites with low nutrient content
			5	Plants on sites with medium nutrient content
			7	Plants on sites rich in nutrients
			8	No bryophytes occur (outcompeted by vascular plants)
			9	No bryophytes occur (outcompeted by vascular plants)
Human impact (Hemeroby)	hemeroby	Occurrence in the gradient of background human impact on the ecosystem	1	Absent
			2	Absent to weak
			3	weak
			4	weak to moderate
			5	moderate
			6	moderate to strong
			7	strong
			8	strong to very strong
			9	very strong
Morphological traits
Life form	life_form	Life forms based on Mägdefrau (1969)	annual	The gametophyte stops growing after producing gametangia and dies after the sporogonium has ripened; pioneers on open soil.
			turf	The upright shoots (no or only slight branching), stand close together and grow on after ripening of the sporogonia by means of acrotonous regenerative shoots; open mineral soils and rocks, forest floors in temperate zones.
			cushions	Basal regenerative shoots are produced usually in considerable numbers on the upright shoots. The cushions therefore grow not only upwards but also extend sideways. Pleurocarpous mosses can also form cushions, their main axes remaining short and the lateral axes extending upwards; rocks, bark; usually high light.
			mat	Plagiotropic bryophytes, the main and lateral shoots of which lie close to the substrate and are attached to it by rhizoids; rocks and the bark of trees; hold considerable capillary water.
			weft	Plagiotropic bryophytes, the main and lateral shoots of which grow loosely through one another and form a covering that is easy to lift from the substrate (forest floor, rotten trunks of trees), a new layer growing every year over that of the previous year.
			dendroid	Bryophytes growing on the ground, the negatively geotropic shoots of which bear at the top a tuft of large leaves or many lateral shoots. Their growth form groups them under the creepshoot mosses.
			rosette	Thallus forming rosettes.
Life strategies	life_strat	Life strategies according to During (1979); if more than one strategy is known, this is presented as life_strat2	f	Fugitives: species that live in unpredictable environments. Short life span; ephemeral or annual; high sexual reproductive effort; large percent of plant; devoted to spore production; low age of first reproduction (first year); spores small (<20 μm), very persistent and long-lived; no asexual reproduction; innovations absent; open turfs
			c	Colonists: species that live where habitat start is unpredictable, but lasts several years; secondary succession. Moderately short life span; (annual-) pauciennial- pluriennial; high reproductive effort both in asexual and sexual diaspore production; asexual reproduction mostly concentrated in the early life stages, sporophytes later, then frequent; innovations normally present; age of first asex…
			a	Annual shuttle: species that require small disturbances that last 1–2 years; survive severe stress periods. Short life span; (ephemeral-) annual-pauciennial ; sexual reproductive effort high, sporophytes very frequent; asexual reproduction absent, innovations mostly absent; age of first reproduction low, normally less than 1 yr; spores large, 25-50 (-200) μm, life span mostly several years; growt…
			s	Short-lived shuttle: species that do not avoid periods of severe stress; habitat lasts 2–3 years. Life span longer, pauci-pluriennnial; sexual reproductive effort rather high, sporophytes ± frequent; asexual reproduction rare or absent; innovations normally present; age of first reproduction ca. 2-3 yr; spores large, 25-50 (-100) μm; life span probably several years; growth form short turf or tha…
			l	Perennial (long-lived) shuttle: species that require stable environments, such as epiphytes, where end of habitat is predictable. Long life span; pluriennial-perennial; sexual reproductive effort moderate, sometimes low to absent; asexual reproductive effort moderate, rather high in cases with rare or no sexual reproduction; innovations present; age of first asexual reproduction variable, normall…
			p	Perennial stayers: most frequent in later successional stages. Long life span; perennials; sexual and asexual reproductive effort rather low to nearly absent, sometimes very localized in small areas; age of first reproduction variable, several years at least; spores small, less than 20 μm; life span variable; growth form wefts, dendroids, mats, also large cushions.
Vegetative dispersal traits
Vegetative regeneration: gemmae	veg_gem	Multicellular buds on short stalks, formed in gemmae cups or leave axes	0	Unknown
			1	Occurring
Vegetative regeneration: branches	veg_bran	Formation of independent plants by branching of the leafy stem, the formation of stoloniferous branches or specially modified branches	0	Unknown
			1	Occurring
Vegetative regeneration: leaves	veg_leav	Caducous leaves from new plants; these may be modified or unmodified leaves	0	Unknown
			1	Occurring
